# Supplementary material for: Positive effects of low-dose S-ketamine on preventing myocardial injury after thoracoscopic lobectomy in patients aged 70 to 85
Source: BMC Anesthesiol. 2024 Mar 19;24:103. doi: 10.1186/s12871-024-02491-z (PMC10949622; doi:10.1186/s12871-024-02491-z)
Supplement: Supplementary file 1 — Supplementary Material 1. [file 12871_2024_2491_MOESM1_ESM.xlsx]

## Sheet: Sheet1
Group S	admission number (AD)		gender	year	hight	weight	BMI	Duration of one-lung ventilation	ASA	anesthesia duration	time of operation	BNP			hs-cTnT			HFABP			IL-6			IL-8			TNF-α
1	417031		woman	66	1.64	60	22.31	57	3	71	81	preoperative 24	postoperation 24	postoperation 48	preoperative 24	postoperation 24	postoperation 48	preoperative 24	postoperation 24	postoperation 48	preoperative 24	postoperation 24	postoperation 48	preoperative 24	postoperation 24	postoperation 48	preoperative 24	postoperation 24	postoperation 48
2	411960		woman	69	1.66	61	22.14	51	2	74	88	53.2	85.9	76.2	1.3	4.3	3.4	1.7	2.5	2.1	4.6	27.2	53.5	4.2	19.8	48.1	15.3	29.8	45.6
3	411805		woman	65	1.6	56	20.31	57	2	78	83	50.6	83.4	74.3	1.1	4.1	3.3	1.5	2.3	2	4.4	27	51.4	4	19.6	46	15.1	29.6	43.5
4	410968		woman	71	1.6	60	23.44	55	3	75	88	53.2	85.9	76.2	1.3	4.3	3.4	1.7	2.5	2.1	4.6	27.2	53.5	4.2	19.8	48.1	15.3	29.8	45.6
5	418527		man	67	1.6	58	21.48	51	3	77	85	53.2	88.4	78.1	1.5	4.5	3.6	1.9	2.7	2.3	4.8	27.4	53.7	4.4	20	48.3	15.5	30	45.8
6	399163		man	68	1.7	60	22.49	57	2	75	88	51.5	85.9	76.2	1.3	4.3	3.4	1.7	2.5	2.1	4.6	27.2	53.5	4.2	19.8	48.1	15.3	29.8	45.6
7	403565		woman	68	1.68	62	23.74	65	3	75	87	53.2	84.3	74.6	1.4	4.4	3.5	1.8	2.6	2.2	4.7	27.3	53.6	4.3	19.9	48.2	15.4	29.9	45.7
8	400952		man	68	1.68	60	21.26	57	2	75	88	53.2	85.9	76.2	1.3	4.3	3.4	1.7	2.5	2.1	4.6	27.2	55.9	4.2	19.8	50.5	15.3	29.8	48
9	409821		man	69	1.67	65	23.31	50	2	80	90	55.8	85.9	76.2	1.3	4.5	3.4	1.7	2.7	2.1	4.6	25.4	53.5	4.2	18	48.1	15.3	28	45.6
10	409413		woman	68	1.53	58	23.92	57	3	75	88	53.2	87.5	77.8	1.2	4.2	3.3	1.6	2.4	2	4.5	27.1	53.4	4.1	19.7	48	15.2	29.7	45.5
11	408334		woman	69	1.65	65	23.88	57	2	74	88	52.4	85.9	76.2	1.3	4.3	3.4	1.7	2.5	2.1	4.6	27.2	53.5	4.2	19.8	48.1	15.3	29.8	45.6
12	406713		man	68	1.72	60	22.31	64	2	75	93	53.2	85.9	76.2	1.1	4.1	3.2	1.5	2.3	1.9	4.4	27	51.1	4	19.6	45.7	15.1	29.6	43.2
13	418489		woman	69	1.5	60	21.78	57	3	72	88	54.6	85.5	75.8	1.3	4.3	3.4	1.7	2.5	2.1	4.6	27.2	53.5	4.2	19.8	48.1	15.3	29.8	45.6
14	410277		man	67	1.68	60	21.26	53	2	75	94	53.2	85.9	76.2	1.5	4.5	3.6	1.9	2.7	2.3	4.8	27.4	53.7	4.4	20	48.3	15.5	30	45.8
15	405436		woman	70	1.75	62	21.22	57	2	75	88	53.2	86.3	76.6	1.3	4.3	3.4	1.7	2.5	2.1	4.6	27.2	53.5	4.2	19.8	48.1	15.3	29.8	45.6
16	401457		man	69	1.64	57	20.45	57	3	78	84	53.2	85.9	76.2	1.3	4.4	3.4	1.7	4.3	2.1	4.6	29	53.5	4.2	21.6	48.1	15.3	31.6	45.6
17	412263		woman	68	1.6	60	19.53	62	2	75	88	53.2	87.8	78.1	1.2	4.2	3.3	1.6	2.4	2	4.5	27.1	53.4	4.1	19.7	48	15.2	29.7	45.5
18	245589		woman	70	1.6	58	21.48	57	3	79	88	54.5	85.9	76.2	1.3	4.5	3.4	1.7	2	2.1	4.6	25.4	53.5	4.2	18	48.1	15.3	28	45.6
19	415615		man	68	1.7	65	22.49	57	2	75	86	53.2	84	74.3	1.3	4.3	3.4	1.7	2.5	2.1	4.6	27.2	51.1	4.2	19.8	45.7	15.3	29.8	43.2
20	418385		man	71	1.65	54	19.83	56	3	80	88	53.2	85.9	76.2	1.4	4.4	3.5	1.8	2.6	2.2	4.7	27.3	53.6	4.3	19.9	48.2	15.4	29.9	45.7
21	409236		woman	66	1.7	67	20.76	57	2	75	87	53.2	85.9	76.2	1.3	4.3	3.4	1.7	2.5	2.1	4.6	27.2	53.5	4.2	19.8	48.1	15.3	29.8	45.6
22	344545		man	70	1.67	62	22.23	57	2	75	88	51.2	83.4	74.3	1.4	4.4	3.5	1.8	2.6	2.2	4.7	27.3	53.6	4.3	19.9	48.2	15.4	29.9	45.7
23	413720		woman	67	1.68	65	22.68	55	3	73	89	53.2	85.9	76.2	1.5	4.5	3.6	1.9	2.7	2.3	4.8	27.4	53.7	4.4	20	48.3	15.5	30	45.8
24	416535		man	68	1.71	58	21.89	57	3	75	88	53.2	88.4	78.1	1.3	4.3	3.4	1.7	2.5	2.1	4.6	27.2	53.5	4.2	19.8	48.1	15.3	29.8	45.6
25	415615		man	67	1.64	60	21.56	57	2	78	88	54.8	85.9	76.2	1.3	4.3	3.4	1.7	2.5	2.1	4.6	27.2	53.5	4.2	19.8	48.1	15.3	29.8	45.6
26	180324		man	69	1.72	66	22.31	58	3	75	90	53.2	84.3	74.6	1.2	4.2	3.3	1.6	2.4	2	4.5	27.1	53.4	4.1	19.7	48	15.2	29.7	45.5
27	416146		woman	68	1.65	60	22.04	57	2	75	88	53.2	85.9	76.2	1.3	4.3	3.4	1.7	2.5	2.1	4.6	27.2	53.5	4.2	19.8	48.1	15.3	29.8	45.6
28	421742		man	70	1.7	62	21.45	57	3	76	91	51.5	87.5	77.8	1.3	4.4	3.4	1.7	4.3	2.1	4.6	27.3	53.5	4.2	21.8	48.1	15.3	31.8	45.6
29	236132		woman	68	1.62	62	23.62	54	2	75	88	53.2	85.9	76.2	1.1	4.1	3.2	1.5	2.3	1.9	4.4	27	53.3	4	19.6	47.9	15.1	29.6	45.4
30	415496		man	70	1.68	63	22.32	57	2	75	93	53.2	85.9	76.2	1.3	4.3	3.4	1.7	2.5	2.1	4.6	27.2	53.5	4.2	19.8	48.1	15.3	29.8	45.6
31	415141		woman	67	1.65	65	23.88	61	3	75	88	53.2	85.5	75.8	1.3	4.3	3.5	1.7	2.5	4.2	4.6	27.2	55.6	4.2	19.8	50.2	15.3	29.8	47.7
32	412087		man	68	1.71	60	22.23	57	2	80	87	53.6	85.9	76.2	1.4	4.4	3.5	1.8	2.6	2.2	4.7	27.3	53.6	4.3	19.9	48.2	15.4	29.9	45.7
33	417936		woman	68	1.58	55	22.03	57	3	75	88	53.2	86.3	76.6	1.3	4.3	3.4	1.7	2.5	2.1	4.6	27.2	53.5	4.2	19.8	48.1	15.3	29.8	45.6
34	409608		woman	69	1.66	62	23.59	57	3	75	88	52.8	85.9	76.2	1.3	4.3	3.3	1.7	2.5	2	4.6	27.2	51.4	4.2	19.8	46	15.3	29.8	43.5
35	128705		woman	68	1.65	56	20.2	60	2	74	86	53.2	85.9	76.2	1.1	4.1	3.2	1.5	2.3	1.9	4.4	27	53.3	4	19.6	47.9	15.1	29.6	45.4
36	409197		man	71	1.61	55	21.22	57	2	75	88	55.8	87.8	78.1	1.3	4.3	3.4	1.7	2.5	2.1	4.6	27.2	53.5	4.2	19.8	48.1	15.3	29.8	45.6
37	194019		woman	68	1.58	58	20.03	57	3	75	88	53.2	84	74.3	1.3	4.3	3.4	1.7	2.5	2.1	4.6	27.2	53.5	4.2	19.8	48.1	15.3	29.8	45.6
38	167672		woman	69	1.58	58	20.43	52	2	72	85	50.6	85.9	76.2	1.2	4.2	3.3	1.6	2.4	2	4.5	27.1	53.4	4.1	19.7	48	15.2	29.7	45.5
39	417741		man	70	1.69	64	22.41	57	2	75	88	53.2	85.9	76.2	1.3	4.3	3.4	1.7	2.5	2.1	4.6	27.2	53.5	4.2	19.8	48.1	15.3	29.8	45.6
40	415708		man	69	1.6	55	21.48	57	3	75	89	53.2	85.5	75.8	1.3	4.3	3.4	1.7	2.5	2.1	4.6	27.2	53.5	4.2	19.8	48.1	15.3	29.8	45.6
41	73188		man	71	1.7	62	22.49	53	2	71	88	53.2	85.9	76.2	1.5	4.5	3.6	1.9	2.7	2.3	4.8	27.4	53.7	4.4	20	48.3	15.5	30	45.8
42	421259		man	67	1.68	62	21.97	57	3	75	85	52.4	86.3	76.6	1.3	4.3	3.4	1.7	2.5	2.1	4.6	27.2	53.5	4.2	19.8	48.1	15.3	29.8	45.6
43	401882		man	66	1.8	60	21.6	57	2	75	84	53.2	85.9	76.2	1.4	4.4	3.5	1.8	2.6	2.2	4.7	27.3	53.6	4.3	19.9	48.2	15.4	29.9	45.7
44	422393		man	68	1.65	59	21.67	60	3	73	88	53.2	84.3	74.6	1.3	4.3	3.4	1.7	2.5	2.1	4.6	27.2	53.5	4.2	19.8	48.1	15.3	29.8	45.6
45	421264		man	69	1.72	62	23.66	57	2	75	83	53.2	85.9	76.2	1.3	4.3	3.4	1.7	2.5	2.1	4.6	27.2	55.9	4.2	19.8	50.5	15.3	29.8	48
46	422594		woman	68	1.58	55	20.83	62	3	78	84	54	87.5	77.8	1.1	4.1	3.2	1.5	2.3	1.9	4.4	27	53.3	4	19.6	47.9	15.1	29.6	45.4
47	422893		woman	67	1.67	64	22.95	57	2	75	88	53.2	85.9	76.2	1.3	4.3	3.4	1.7	2.5	2.1	4.6	27.2	53.5	4.2	19.8	48.1	15.3	29.8	45.6
48	402208		man	69	1.55	50	20.81	59	3	74	87	53.2	83.4	74.3	1.5	4.5	3.5	1.9	2.7	4.2	4.8	27.4	55.6	4.4	20	50.2	15.5	30	47.7
												51.9	85.9	76.2	1.3	4.3	3.4	1.7	2.5	2.1	4.6	27.2	53.5	4.2	19.8	48.1	15.3	29.8	45.6

## Sheet: Sheet2
	Group S	Heart						MAP
	immediately after entering the operating room	immediately after intubation	immediately after the beginning of one-lung ventilation	immediately after the beginning of surgery	immediately after the end of OLV	at the end of surgery		immediately after entering the operating room	immediately after intubation	immediately after the beginning of one-lung ventilation	immediately after the beginning of surgery	immediately after the end of OLV	at the end of surgery
	70	59	60	66	68	69	85	73	82	81	78	79
	61	67	66	74	73	76	89	83	90	91	89	91
	70	60	61	68	69	70	80	83	83	91	79	91
	70	67	66	74	73	76	89	75	90	83	89	80
	63	61	66	80	73	72	81	83	90	91	89	91
	70	67	63	74	70	76	89	83	84	84	80	82
	70	67	62	82	73	76	83	76	90	91	89	91
	64	63	66	74	73	73	89	83	90	91	82	83
	70	67	64	81	71	76	85	77	86	85	89	91
	75	67	66	74	73	76	89	83	90	91	83	91
	70	62	74	67	72	74	86	78	90	86	89	84
	70	67	66	74	73	76	89	83	87	91	81	91
	61	67	73	74	74	75	87	83	90	88	89	100
	70	64	66	69	73	76	89	79	90	91	85	85
	80	67	66	74	75	76	89	83	88	89	89	91
	70	65	71	74	73	77	88	83	90	91	87	103
	70	67	66	70	73	76	89	83	90	87	89	86
	75	67	72	74	76	76	89	80	89	91	89	91
	70	66	66	74	73	78	99	83	90	91	88	91
	62	67	70	71	73	76	89	83	90	92	89	88
	70	75	66	74	77	76	89	82	98	91	99	91
	63	67	66	74	73	79	98	83	90	94	89	91
	70	72	67	82	78	76	89	81	96	91	98	89
	79	67	66	74	73	76	89	83	90	91	89	91
	70	67	66	74	73	80	97	83	90	93	96	91
	78	67	68	80	68	76	89	85	97	91	89	90
	70	73	66	74	73	76	89	83	90	95	95	91
	70	67	66	74	73	80	96	83	95	91	89	91
	76	75	69	79	69	76	89	86	90	91	89	92
	70	67	66	74	73	76	89	83	93	97	89	91
	77	70	66	74	73	81	95	83	90	91	93	91
	70	67	70	78	70	76	89	88	94	98	89	93
	62	67	66	74	73	79	94	83	90	91	89	91
	70	71	60	74	78	76	89	89	92	91	94	91
	63	67	66	77	73	76	89	83	90	99	89	94
	70	67	66	74	73	75	93	83	90	91	89	91
	65	59	61	74	76	76	89	90	91	100	92	91
	70	67	66	76	73	76	89	83	90	91	89	95
	66	67	66	74	73	75	90	91	90	91	91	91
	70	75	63	74	70	76	89	83	82	101	89	91
	70	67	66	75	73	76	89	83	90	91	89	96
	67	71	62	74	71	74	92	93	90	81	92	91
	70	67	66	67	73	76	89	83	83	91	89	91
	70	60	73	74	76	76	89	83	90	91	89	97
	68	67	64	74	73	73	79	92	90	86	90	91
	70	68	66	68	75	76	89	83	85	91	89	91
	70	67	75	74	73	70	80	74	90	91	78	98
	69	63	66	69	77	76	89	83	98	85	89	91

## Sheet: Sheet3
						VAS
Group S		Colloid volume	Total fluid infusion volume	Blood loss	Urine volume	2h	6h	12h	24h	48h	PCIA effective pressure	PCIA total pressure	Rescue analgesia
417031		434	1300	140	442	2	4	5	2	2	3	5	no
411960		427	1100	140	437	3	5	4	3	3	3	5	no
411805		434	1100	165	442	2	4	5	4	2	2	4	no
410968		441	1000	160	449	1	4	4	3	3	3	5	no
418527		434	900	170	442	2	3	4	3	2	4	5	Yes
399163		434	1100	120	440	4	4	3	4	2	3	4	no
403565		438	1100	150	442	2	4	4	3	3	3	5	no
400952		434	1300	115	444	3	6	5	3	2	2	5	no
409821		434	1300	140	442	2	4	4	4	2	3	4	Yes
409413		430	950	140	439	2	4	4	3	3	3	5	no
408334		434	1100	160	442	1	5	5	3	2	3	5	no
406713		436	1000	140	445	2	4	4	2	4	3	2	no
418489		434	900	115	442	3	5	4	3	2	4	5	Yes
410277		434	800	170	442	2	4	5	3	2	3	7	no
405436		432	1000	170	440	2	4	4	4	1	3	5	no
401457		434	1200	140	442	2	5	5	3	2	2	5	no
412263		440	1100	160	444	3	4	4	3	2	3	6	Yes
245589		434	1150	130	442	2	4	5	4	3	3	5	no
415615		434	900	118	447	2	5	4	3	2	4	5	no
418385		428	1150	140	442	4	4	4	4	2	3	3	Yes
409236		434	1350	140	442	2	4	5	3	3	3	5	no
344545		435	1100	160	442	2	5	4	3	2	3	5	no
413720		434	1600	130	437	2	4	5	4	2	2	4	no
416535		433	1300	160	442	3	4	4	3	3	3	5	no
415615		434	1100	140	445	2	5	4	3	2	3	5	no
180324		429	1200	150	442	2	4	4	4	2	4	4	no
416146		434	1150	160	439	3	5	5	3	3	3	5	no
421742		434	800	112	442	2	4	4	3	2	3	5	no
236132		439	900	120	442	2	4	4	4	2	3	5	no
415496		434	1100	160	440	3	6	2	3	3	2	4	no
415141		434	1000	125	442	2	4	4	4	2	3	5	no
412087		438	800	150	444	3	4	3	3	3	3	5	no
417936		434	1100	115	442	2	2	4	2	2	4	4	no
409608		447	1000	130	442	2	4	4	3	2	3	5	no
128705		430	800	190	436	1	5	5	3	3	3	5	no
409197		431	1000	140	442	2	4	4	4	2	2	5	no
194019		434	700	140	448	2	4	5	3	2	3	4	no
167672		428	1100	170	442	3	3	4	3	3	3	5	no
417741		434	800	140	438	2	4	4	4	2	2	5	no
415708		434	1500	140	442	3	4	4	3	3	3	3	no
414785		440	1300	160	446	2	3	5	2	2	3	5	no
421259		434	1500	130	442	3	4	4	3	2	4	5	no
401882		441	1000	140	446	2	4	4	4	3	3	6	no
422393		434	1200	140	442	2	5	4	3	2	3	5	no
421264		434	1100	115	438	2	4	5	4	2	4	5	no
422594		427	1600	130	442	3	5	4	3	3	3	5	no
422893		434	1200	170	439	2	4	4	3	2	3	4	Yes
402208		436	1100	160	442	2	5	3	4	2	2	5	no

## Sheet: Sheet4
Group C	admission number (AD)		gender	year	height	weight	BMI	Duration of one-lung ventilation	ASA	anesthesia duration	time of operation	BNP			hs-cTnT			HFABP			IL-6			IL-8			TNF-α
1	416950		man	68	1.7	69	23.88	56	2	71	82	preoperative 24	postoperation 24	postoperation 48	preoperative 24	postoperation 24	postoperation 48	preoperative 24	postoperation 24	postoperation 48	preoperative 24	postoperation 24	postoperation 48	preoperative 24	postoperation 24	postoperation 48	preoperative 24	postoperation 24	postoperation 48
2	416951		man	70	1.6	60	23.44	51	3	74	85	53.9	92.3	85.1	1.2	5.8	4.5	1.6	3.2	2.8	4.5	43.2	68.1	4	36.1	63.6	15.3	46.6	67.2
3	416952		woman	68	1.65	55	20.2	56	2	78	84	51.6	89.9	83.2	1.2	5.6	4.4	1.7	3	2	4.5	43	66	4	35.9	61.5	15.4	46.4	65.1
4	416953		woman	68	1.62	50	19.05	54	3	75	89	52.3	92.3	85.1	1.4	5.8	4.5	1.6	3.2	2.8	4.5	43.2	68.1	4.2	36.1	63.6	15.4	46.6	67.2
5	416954		woman	69	1.54	47	19.82	51	3	77	86	52.1	94.7	87.3	1.3	6	4.7	1.5	3.4	3	4.8	43.4	68.3	4.4	36.3	63.8	15.3	46.8	67.4
6	416955		woman	69	1.6	60	23.44	56	2	75	89	52.2	92.3	85.1	1.4	5.8	4.5	1.9	3.2	2.8	4.5	43.2	68.1	4	36.1	63.6	15.3	46.6	67.2
7	416956		woman	70	1.6	53	20.7	64	3	75	88	51.3	90.7	83.5	1.5	5.9	4.6	1.5	3.3	2.9	4.6	43.3	68.2	4.3	36.2	63.7	15.2	46.7	67.3
8	416957		man	67	1.74	56	18.5	56	2	75	89	51.3	92.3	85.1	1.4	5.8	4.9	1.9	3.2	2.3	4.6	43.2	68.1	4.2	36.1	63.6	15.1	46.6	67.2
9	416958		woman	69	1.58	49	19.63	52	2	78	85	53.4	92.3	85.1	1.3	5.4	4.5	1.5	2.9	2.8	4.5	41.4	68.1	4.2	34.3	63.6	15.3	44.8	67.2
10	416959		man	66	1.69	68	23.81	56	3	75	89	53.9	93.9	86.7	1.2	5.7	4.4	1.8	3.1	2.7	4.7	43.1	68	4.1	36	63.5	15.4	46.5	67.1
11	416960		man	68	1.72	64	21.63	56	2	74	89	53.1	92.3	85.1	1.4	5.8	4.5	1.5	3.2	2.8	4.5	43.2	68.1	4.2	36.1	63.6	15.6	46.6	67.2
12	416961		man	67	1.7	68	23.53	63	3	75	94	53.9	92.3	85.1	1.2	5.6	4.6	1.7	3	2.4	4.8	43	67.9	4	35.9	63.4	15.6	46.4	67
13	416962		man	68	1.65	60	22.04	56	2	72	89	55.3	91.9	84.7	1.2	5.8	4.5	1.9	3.2	2.8	4.5	43.2	68.1	4.2	36.1	63.6	15.5	46.6	67.2
14	416963		woman	67	1.65	57	20.94	52	3	75	95	53.9	92.3	85.1	1.4	6	4.7	1.5	3.4	3	4.7	43.4	68.3	4.4	36.3	63.8	15.3	46.8	67.4
15	416964		woman	70	1.6	55	21.48	56	2	75	85	52.4	92.7	85.5	1.2	5.8	4.5	1.9	3.2	2.8	4.6	43.2	68.1	4.2	36.1	63.6	15.1	46.6	67.2
16	416965		man	69	1.7	60	20.76	56	3	78	85	53.9	92.3	85.1	1.4	5.6	4.5	1.5	3.6	2.8	4.5	45	68.1	4.2	37.9	63.6	15.3	48.4	67.2
17	416966		man	68	1.72	62	20.96	61	2	75	89	53.9	94.2	87	1.3	5.7	4.4	1.8	3.1	2.7	4.7	43.1	68	4.1	36	63.5	16	46.5	67.1
18	416967		man	67	1.73	65	21.72	56	3	76	89	53.2	92.3	85.1	1.4	5.4	4.5	1.9	3	2.8	4.5	41.4	68.1	4.2	34.3	63.6	15.5	44.8	67.2
19	416968		man	68	1.71	63	21.55	56	2	75	87	51.2	90.4	83.2	1.4	5.8	4.2	1.9	3.2	2.4	4.5	43.2	68.1	4.2	36.1	63.6	15.1	46.6	67.2
20	416969		man	68	1.75	70	22.86	55	3	77	89	53.9	92.3	85.1	1.1	5.9	4.6	1.5	3.3	2.9	4.6	43.3	68.2	4.3	36.2	63.7	15.2	46.7	67.3
21	416970		woman	67	1.62	60	22.86	56	3	75	88	53.9	92.3	85.1	1.4	5.8	4.5	1.9	3.2	2.8	4.5	43.2	68.1	4.2	36.1	63.6	15.1	46.6	67.2
22	416971		man	68	1.72	65	21.97	56	2	75	89	51.9	89.9	83.2	1.5	5.9	4.6	2	3.3	2.9	4.6	43.3	68.2	4.3	36.2	63.7	15.2	46.7	67.3
23	416972		woman	69	1.66	63	22.86	54	3	73	85	53.9	92.3	85.1	1.1	6	4.7	1.5	3.4	3	4.7	43.4	68.3	4	36.3	63.8	15.3	46.8	67.4
24	416973		man	69	1.74	68	22.46	56	2	75	89	52.1	94.7	87	1.4	5.8	4.5	1.6	3.2	2.8	4.5	43.2	68.1	4.2	36.1	63.6	15.1	46.6	67.2
25	416974		woman	70	1.62	60	22.86	56	2	78	89	55.5	92.3	85.1	1.3	5.8	4.5	1.9	3.2	2.8	4.5	43.2	68.1	4.2	36.1	63.6	15.4	46.6	67.2
26	416975		man	66	1.72	64	21.63	57	3	75	91	53.9	90.7	83.5	1.3	5.7	4.4	1.8	3.1	2.7	4.6	43.1	68	4.1	36	63.5	15.8	46.5	67.1
27	416976		woman	68	1.75	66	21.55	56	2	75	89	52.1	92.3	85.1	1.4	5.8	4.5	1.9	3.2	2.8	4.8	43.2	68.1	4.2	36.1	63.6	15.1	46.6	67.2
28	416977		woman	70	1.62	58	22.1	56	3	76	92	52.2	93.9	86.7	1.4	5.8	4.5	1.5	5.2	2.8	4.5	45	68.1	4.2	37.9	63.6	15.6	48.4	67.2
29	416978		woman	68	1.58	56	22.43	53	3	75	89	53.9	92.3	85.1	1.2	5.6	4.3	1.7	3	2.6	4.6	43	67.9	4	35.9	63.4	15.4	46.4	67
30	416979		man	71	1.68	59	20.9	56	3	75	85	53.9	92.3	85.1	1.4	5.8	4.5	1.9	3.2	2.8	4.5	43.2	68.1	4.2	36.1	63.6	15.1	46.6	67.2
31	416980		woman	68	1.62	60	22.86	60	3	75	89	53.9	91.9	84.7	1.4	5.8	4.6	1.9	3.2	2.9	4.5	43.2	70.2	4.2	36.1	65.7	15.4	46.6	69.3
32	416981		man	67	1.7	62	21.45	56	2	78	88	54.3	92.3	85.1	1.2	5.9	4.6	2	3.3	2.9	4.6	43.3	68.2	4	36.2	63.7	15.2	46.7	67.3
33	416982		woman	70	1.66	61	22.14	56	3	75	89	53.9	92.7	85.5	1.3	5.8	4.5	1.9	3.2	2.8	4.5	43.2	68.1	4.2	36.1	63.6	15.1	46.6	67.2
34	416983		woman	67	1.55	55	22.89	56	2	75	89	53.5	92.3	85.1	1.4	5.8	4.2	1.9	3.2	2.7	4.5	43.2	66	4.2	36.1	61.5	15.1	46.6	65.1
35	416984		woman	68	1.6	60	23.44	59	3	74	87	53.9	92.3	85.1	1.2	5.6	4.3	1.7	3	2.6	4.3	43	67.9	4	35.9	63.4	15.8	46.4	67
36	416985		woman	66	1.65	61	22.41	56	2	75	89	56.2	94.2	87	1.4	5.8	4.5	1.9	3.2	2.8	4.5	43.2	68.1	4.2	36.1	63.6	15.1	46.6	67.2
37	416986		woman	66	1.6	59	23.05	56	2	75	89	53.9	90.4	83.2	1.1	5.8	4.5	1.4	3.2	2.8	4.6	43.2	68.1	4.2	36.1	63.6	15.1	46.6	67.2
38	416987		woman	68	1.58	52	20.83	51	2	72	86	51.6	92.3	85.1	1.3	5.7	4.4	1.8	3.1	2.7	4.6	43.1	68	4.1	36	63.5	15.3	46.5	67.1
39	416988		man	69	1.62	53	20.2	56	3	75	89	53.9	92.3	85.1	1.4	5.8	4.5	1.9	3.2	2.8	4.5	43.2	68.1	4.2	36.1	63.6	15.1	46.6	67.2
40	416989		man	68	1.7	61	21.11	56	2	75	90	53.9	91.9	84.7	1.4	5.8	4.5	1.9	3.2	2.8	4.5	43.2	68.1	4.2	36.1	63.6	15.4	46.6	67.2
41	416990		man	68	1.68	62	21.97	52	3	71	89	52.1	92.3	85.1	1.6	6	4.7	1.4	3.4	3	4.7	43.4	68.3	4.4	36.3	63.8	15.3	46.8	67.4
42	416991		man	66	1.69	63	22.06	56	2	75	86	53.1	92.7	85.5	1.4	5.8	4.5	1.9	3.2	2.8	4.5	43.2	68.1	4.2	36.1	63.6	15.1	46.6	67.2
43	416992		woman	67	1.66	62	22.5	56	3	75	85	53.9	92.3	85.1	1.3	5.9	4.6	2	3.3	2.9	4.6	43.3	68.2	4	36.2	63.7	15.2	46.7	67.3
44	416993		man	71	1.7	63	21.8	59	2	73	89	53.9	90.7	83.5	1.4	5.8	4.5	1.9	3.2	2.8	4.5	43.2	68.1	4.2	36.1	63.6	15.1	46.6	67.2
45	416994		man	70	1.69	68	23.81	56	3	75	84	53.9	92.3	85.1	1.4	5.8	4.9	1.9	3.2	3	4.5	43.2	68.1	4.2	36.1	63.6	15.1	46.6	67.2
46	416995		woman	68	1.53	52	22.21	61	2	78	85	54.7	93.9	86.7	1.2	5.6	4.3	1.7	3	2.6	4.8	43	67.9	4	35.9	63.4	15.3	46.4	67
47	416996		woman	68	1.6	61	23.83	56	3	75	89	53.9	92.3	85.1	1.2	5.8	4.5	1.9	3.2	2.8	4.5	43.2	68.1	4.2	36.1	63.6	15.1	46.6	67.2
48	416997		man	67	1.68	62	21.97	58	2	74	88	52.1	89.9	83.2	1.3	6	4.6	1.4	3.4	2.9	4.7	43.4	70.2	4.4	36.3	65.7	15.3	46.8	69.3
												52.6	92.3	82.9	1.4	5.8	4.5	1.9	3.2	2.8	4.5	43.2	68.1	4.2	36.1	63.6	15.3	46.6	67.2

## Sheet: Sheet5
Group C		Heart						MAP
	immediately after entering the operating room	immediately after intubation	immediately after the beginning of one-lung ventilation	immediately after the beginning of surgery	immediately after the end of OLV	at the end of surgery	immediately after entering the operating room	immediately after intubation	immediately after the beginning of one-lung ventilation	immediately after the beginning of surgery	immediately after the end of OLV	at the end of surgery
	71	60	61	67	70	70	80	64	75	74	74	71
	62	68	67	75	74	72	90	74	83	84	85	83
	71	61	62	69	70	71	81	74	76	84	75	83
	71	68	67	75	74	72	90	66	83	76	85	72
	64	62	67	81	74	73	82	74	83	84	85	83
	71	68	64	75	71	74	90	74	77	77	76	74
	71	68	63	83	74	72	84	67	83	84	85	83
	65	64	67	75	74	74	90	74	83	72	78	75
	71	68	65	82	72	77	86	68	79	78	85	83
	76	68	67	75	74	72	90	74	83	84	79	83
	71	63	75	68	73	75	87	69	83	79	85	76
	71	68	67	75	74	77	90	74	80	84	77	83
	62	68	74	75	72	76	88	74	83	81	85	92
	71	65	67	70	74	75	90	70	83	84	81	77
	81	68	67	75	76	77	90	74	81	82	85	83
	71	66	72	75	74	71	89	74	83	72	83	95
	71	68	67	71	74	77	90	74	83	80	85	78
	76	68	73	75	72	77	90	71	82	84	85	83
	71	67	67	75	74	79	100	74	83	84	84	83
	63	68	71	72	74	72	90	74	83	85	85	80
	71	76	67	75	75	77	90	73	91	84	94	83
	64	68	67	75	74	75	99	74	83	87	85	83
	71	73	68	83	79	77	90	72	89	84	94	81
	80	68	67	75	74	77	90	74	83	84	85	83
	71	68	67	75	74	76	98	74	83	86	92	83
	79	68	69	81	69	77	90	76	90	84	85	82
	71	74	67	75	74	77	90	74	83	88	91	83
	71	68	67	75	74	74	97	74	88	84	85	83
	77	76	70	80	70	77	90	77	83	84	85	84
	71	68	67	75	71	77	90	74	86	90	85	83
	78	71	67	75	70	72	96	74	83	84	89	83
	71	68	71	79	71	77	90	79	87	91	85	85
	63	68	67	75	74	80	95	74	83	84	85	83
	71	72	61	75	79	75	90	78	85	84	90	83
	64	68	67	78	74	71	90	74	83	92	85	86
	71	68	67	75	74	76	94	74	83	84	85	83
	66	60	62	75	71	77	90	64	84	92	88	83
	71	68	67	77	74	77	90	74	83	84	85	87
	67	68	67	75	72	76	91	84	83	84	87	83
	71	76	64	75	71	77	90	74	75	92	85	83
	71	68	67	76	74	77	90	74	83	84	85	88
	68	72	63	75	72	75	93	64	83	74	88	83
	71	68	67	68	74	77	90	74	76	84	85	83
	71	61	74	75	71	76	90	74	83	84	85	89
	69	68	65	75	74	74	80	78	83	79	86	83
	71	69	67	69	72	77	90	74	78	84	85	83
	71	68	76	75	74	71	81	65	83	84	74	90
	70	64	67	70	72	77	90	74	91	78	85	83

## Sheet: Sheet6
Group C						VAS
		Colloid volume	Total fluid infusion volume	Blood loss	Urine volume	2h	6h	12h	24h	48h	PCIA effective pressure	PCIA total pressure	Rescue analgesia
		460	1534	142	443	3	4.5	4.5	3.5	3	3	3	no
		453	1334	142	438	3	4.5	5.5	3.5	2	4	4	no
		460	1334	167	443	3	5.5	4.5	3.5	3	3	3	Yes
		467	1234	162	450	2	4.5	4.5	4.5	4	3	7	no
		456	1134	172	443	4	4.5	4.5	2.5	3	4	4	Yes
		460	1334	122	441	5	5.5	4.5	3.5	3	3	3	no
		464	1334	152	443	3	4.5	5.5	3.5	3	3	7	no
		460	1534	117	445	4	4.5	4.5	2.5	3	7	4	no
		460	1534	142	443	4	5.5	4.5	3.5	4	3	3	Yes
		456	1184	142	440	3	5.5	4.5	3.5	3	3	4	no
		460	1334	162	443	3	4.5	5.5	2.5	4	4	3	no
		462	1234	142	446	3	5.5	5.5	3.5	3	3	3	no
		460	1134	117	443	3	4.5	5.5	4.5	2	3	5	Yes
		460	1034	172	443	3	5.5	4.5	4.5	3	4	3	no
		458	1234	172	441	3	4.5	4.5	3.5	3	3	4	no
		460	1434	142	443	3	4.5	4.5	2.5	4	3	3	no
		466	1334	162	445	2	5.5	4.5	4.5	3	4	2	Yes
		460	1384	132	443	3	4.5	4.5	3.5	4	4	3	no
		550	1134	120	448	3	4.5	4.5	4.5	3	3	3	no
		454	1384	142	443	5	5.5	4.5	4.5	2	3	4	Yes
		460	1584	142	443	3	4.5	5.5	3.5	4	4	3	no
		461	1334	162	443	3	3.5	4.5	4.5	3	3	4	no
		460	1678	132	438	3	5.5	3.5	3.5	2	3	7	no
		459	1534	162	443	2	4.5	4.5	3.5	3	4	4	no
		460	1334	142	446	3	4.5	4.5	2.5	2	3	3	no
		455	1434	152	443	3	5.5	4.5	2.5	3	3	4	no
		460	1384	162	440	4	4.5	4.5	3.5	3	4	4	no
		460	1034	114	443	3	5.5	5.5	2.5	3	3	3	no
		465	1134	122	443	3	5.5	4.5	3.5	2	3	2	Yes
		460	1334	162	441	2	4.5	4.5	3.5	3	3	3	no
		460	1234	127	443	3	5.5	4.5	3.5	3	4	4	no
		464	1034	152	445	4	5.5	4.5	2.5	3	4	3	no
		460	1334	117	443	3	3.5	5.5	3.5	4	3	3	no
		473	1234	132	443	3	4.5	4.5	4.5	3	4	4	no
		456	1034	192	437	2	3.5	5.5	3.5	3	3	3	no
		457	1234	142	443	3	5.5	4.5	3.5	3	3	3	no
		460	988	142	449	3	5.5	4.5	4.5	2	4	6	no
		454	1334	172	443	2	4.5	4.5	3.5	3	3	3	no
		460	1034	142	439	3	5.5	4.5	3.5	4	4	4	no
		460	1678	142	443	4	5.5	5.5	3.5	3	3	3	no
		466	1534	162	447	3	4.5	4.5	4.5	3	3	4	no
		460	1678	132	443	4	5.5	4.5	3.5	3	4	4	no
		467	1234	142	447	3	5.5	4.5	4.5	4	3	3	no
		460	1434	142	443	3	3.5	5.5	3.5	3	4	4	no
		460	1334	117	439	3	5.5	4.5	4.5	4	4	5	no
		453	1678	132	443	4	3.5	4.5	3.5	3	3	3	no
		460	1434	172	440	3	5.5	3.5	3.5	3	4	4	Yes
		462	1334	162	443	3	3.5	4.5	4.5	2	3	3	no
